# Supplementary material for: A novel sustainable and green mechanochemical route from a (HSiO1.5)n polymer to emissive silicon nanocrystals
Source: Royal Society of Chemistry journal article supplement (doi:10.1039/d2tc02352k), 2022-01-01
Supplement: d2tc02352k1.pdf [file d2tc02352k1.pdf]

## Electronic Supplementary Information

# A Novel Sustainable and Green Mechanochemical Route from $(\text{HSiO}_{1.5})_n$ Polymer to Emissive Silicon Nanocrystals

*Yuping Xu,<sup>a</sup> Yunzi Xin,<sup>b</sup> Kunihiko Kato<sup>b</sup> and Takashi Shirai<sup>\*ab</sup>*

*\*[shirai@nitech.ac.jp](mailto:shirai@nitech.ac.jp)*

<sup>a</sup> Department of Life Science and Applied Chemistry, Graduate School of  
Engineering, Nagoya Institute of Technology, Gokiso-cho, Showa-ku, Nagoya, Aichi  
466-8555, Japan

<sup>b</sup> Advanced Ceramics Research Center, Nagoya Institute of Technology, Gokiso-cho,  
Showa-ku, Nagoya, Aichi 466-8555, Japan

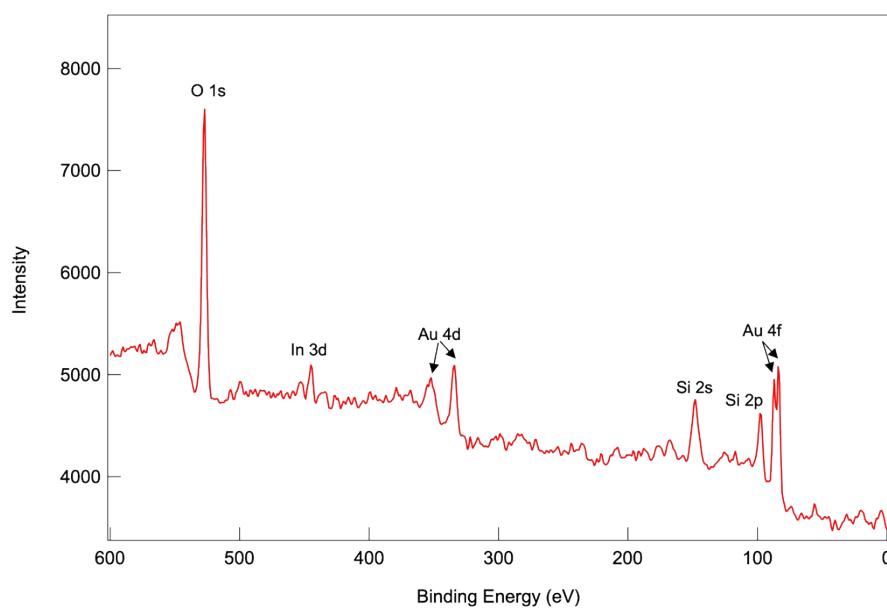

**Figure S1.** XPS survey spectra of the mechanochemically treated  $(\text{HSiO}_{1.5})_n$  polymer with milling balls in size of 10 mm at a rotation speed of 400 rpm in 3 hours (B10\_T3h). In 3d comes from substrate of measurement, and Au is used for calibration. Si 2p, Si 2s and O 1s are attributed to pure  $(\text{HSiO}_{1.5})_n$  polymer without Zr-related impurities after the mechanochemical process.

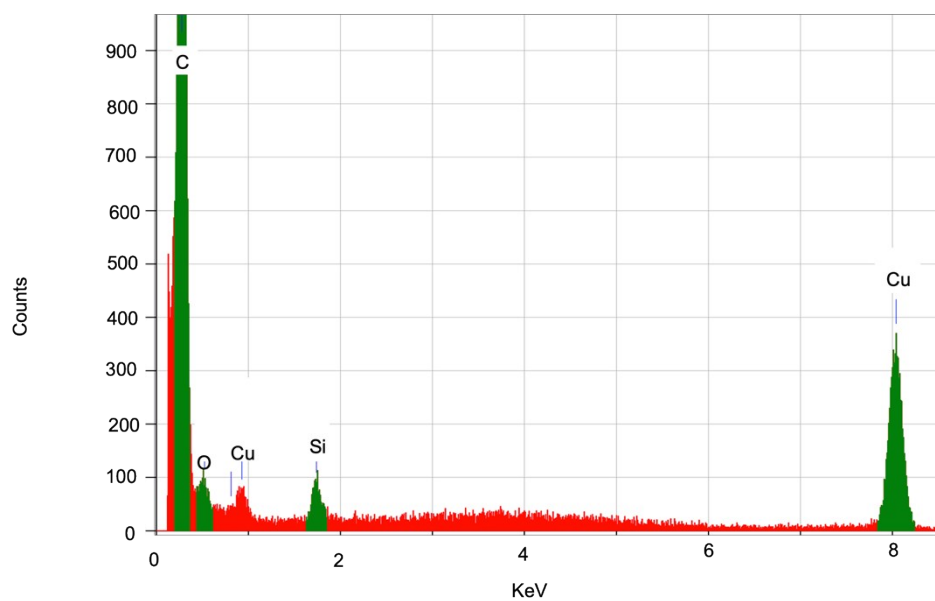

**Figure S2.** EDX spectra of mechanochemically treated  $(\text{HSiO}_{1.5})_n$  polymer with milling balls in size of 10 mm at a rotation speed of 400 rpm in 3 hours (B10\_T3h). C, Cu are collected from the grid for measurement. Peaks of Si and O exemplifies the presence of Si and O components, without Zr-related impurities after the mechanochemical process.

In terms of sustainability, We calculated the electric energy consumptions of a lab-made tube furnace and a high-energy planetary ball-mill (Fritsch, Pulverisette 7) equipment for processing the same amount of  $(\text{HSiO}_{1.5})_n$  polymer towards synthesis of Si NCs via thermal- or mechanochemical approaches, respectively. Specifically, the  $(\text{HSiO}_{1.5})_n$  polymer was pyrolyzed under flowing 95% Ar/ 5%  $\text{H}_2$  with a flux rate of 250 mL/min from room temperature to 1100 °C for 2.5 h, and held at 1100 °C for 1 h, then cooling to room temperature naturally. Under the condition of mechanochemical route,  $(\text{HSiO}_{1.5})_n$  polymer were processed for 3 h in a sealed milling vessel (80 mL, filling rate: 10%) fulfilled with Ar. The electric energy consumption  $W$  is calculated by

$$W = PT$$

where  $P$  is the power consumption of devices which was measured by a clamp power logger (ZN-CTC11, OMRON Corp.) for a tube furnace or recorded by the EASY GTM-System equipped in a milling vessel. The monitored results are shown as Fig. S3.  $T$  is the electric supply time, which is equal to at least 3.5 h (2.5 h for heating process, in addition, holding at 1100 for 1 h) and 3 h for mechanochemical process.

As a result, in the case of thermal pyrolysis,  $W = 2.359 \text{ kW} \cdot \text{h} = 8.492 \times 10^6 \text{ J}$ , while for mechanochemically treatment process,  $W = 0.162 \text{ kW} \cdot \text{h} = 5.843 \times 10^5 \text{ J}$ . Therefore, the energy consumption of thermal pyrolysis is almost 15 times higher than planetary ball milling process.

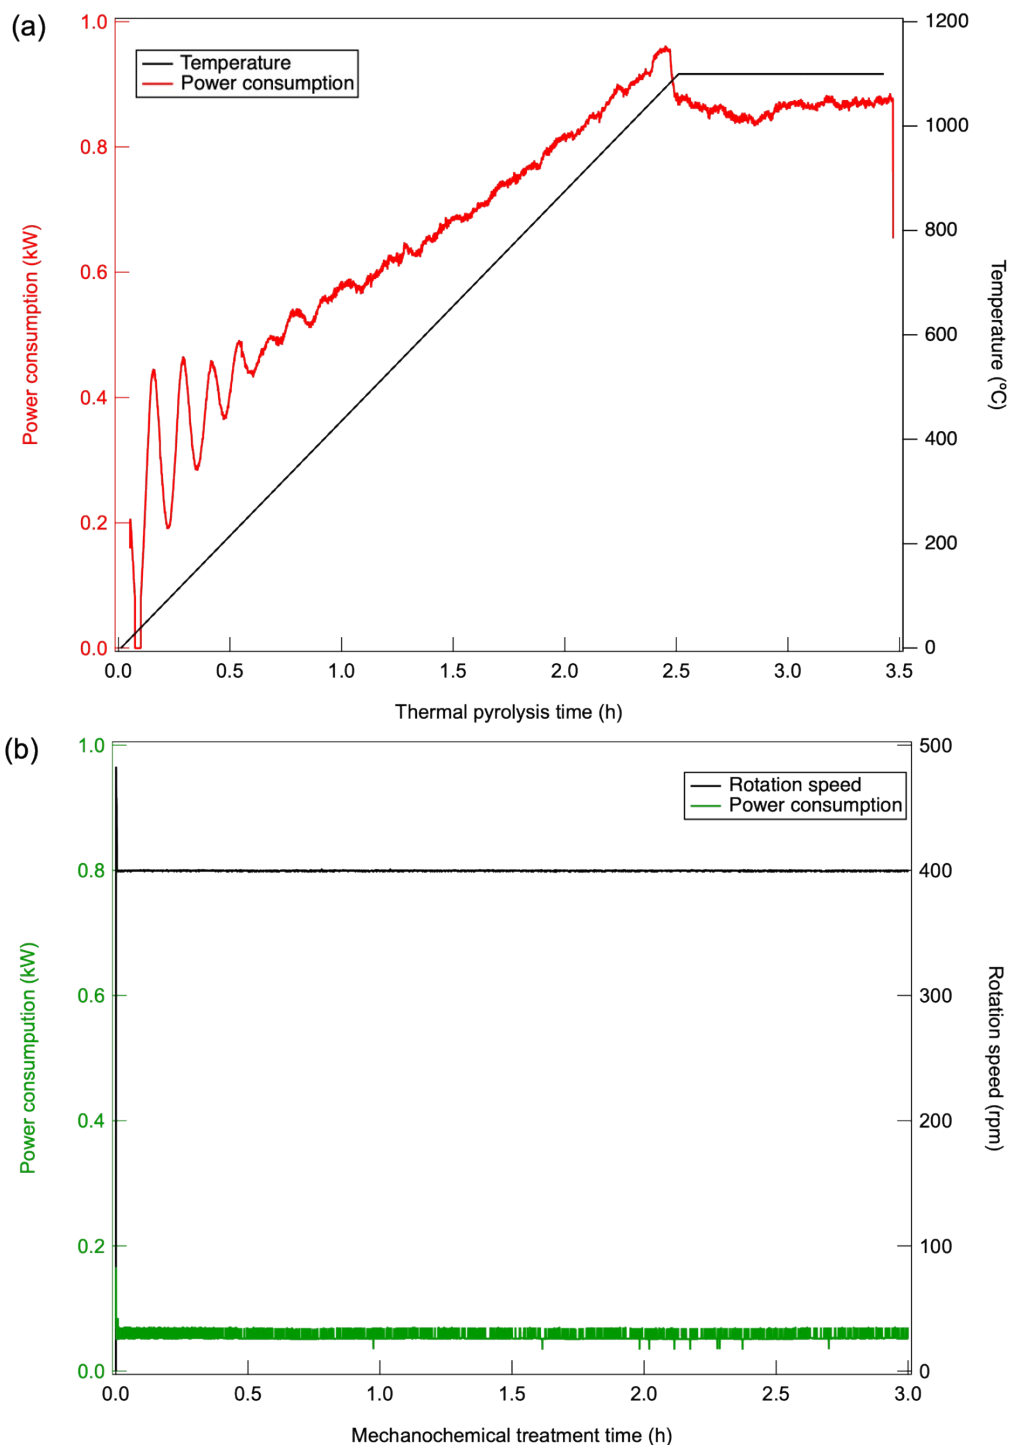

**Figure S3.** (a) Power consumption of a tube furnace for synthesis of Si NCs via high temperature thermal pyrolysis of  $(\text{HSiO}_{1.5})_n$  polymer (b) power consumption of a high-energy planetary ball-mill equipment for processing the same amount of  $(\text{HSiO}_{1.5})_n$  polymer towards synthesis of Si NCs via mechanochemically treatment process.

**Table S1.** Comparison between conventional high temperature induced thermal pyrolysis and the proposed mechanochemical route of (HSiO<sub>1.5</sub>)<sub>n</sub> polymer for emissive

| Synthesis route       | Conditions                                 | Surface passivation | Size/nm | PL wavelength/nm | QY   | Ref.             |
|-----------------------|--------------------------------------------|---------------------|---------|------------------|------|------------------|
| Thermal pyrolysis     | 1100 °C, 1 h<br>5% H <sub>2</sub> /95% Ar  | Decyl-              | 3.2     | 600–650          | NA   | 1                |
| Thermal pyrolysis     | 1100 °C, 1 h,<br>5% H <sub>2</sub> /95% Ar | Dodecyl-            | 1.2     | 420              | 3%   | 2                |
| Thermal pyrolysis     | 1100 °C, 1 h,<br>5% H <sub>2</sub> /95% Ar | allylbenzene-       | 1.0     | 600              | 5%   | 3                |
| Thermal pyrolysis     | 1100 °C, 1 h<br>5% H <sub>2</sub> /95% Ar  | Dodecyl-            | 4.6     | 800              | 10%  | 4                |
| Mechanochemical route | 10 mm, 400 rpm, 3 h                        | Decyl-              | 4.8     | 610              | 9.8% | <b>This work</b> |

free-standing Si NCs synthesis and their optical properties.

## References

1. M. L. Mastronardi, F. Henrich, E. J. Henderson, F. Maier-Flaig, C. Blum, J. Reichenbach, U. Lemmer, C. Kübel, D. Wang, M. M. Kappes, G. A. Ozin, *J. Am. Chem. Soc.*, **2011**, *133*, 11928–11931.
2. Y. Xin, R. Wakimoto, K. I. Saitow, *Chem. Lett.*, **2017**, *46*, 699–702.
3. M. L. Mastronardi, F. Maier-Flaig, D. Faulkner, E. J. Henderson, C. Kübel, U. Lemmer, G. A. Ozin, *Nano Lett.*, **2012**, *12*, 337–342.
4. S. Terada, Y. Xin, K. I. Saitow, *Chem. Mater.*, **2020**, *32*, 8382–8392.
